# Supplementary material
Source: MDPI journal article supplement (https://www.mdpi.com/1424-2818/15/9/972)
Supplement: s1 [file s1]

**Table S1.** Biological and ecological characteristics of syngnathid species registered for Italian waters with an indication of their conservation status according to the IUCN. NT: Near threatened, DD: Data deficient. AS: Artificial substrates, Cor: Coralligenous, DCBWH: Detritic coarse bottom with holdfasts, MB: Muddy bottom, PB: Phanerogams beds, RBWAC: Rocky bottom with algal coverage, SBWAC: Sandy bottom with algal coverage, SBWH: Sandy bottom without holdfasts.

| Species                        | IUCN status | Habitat type                               | Environment type             | Depth range (m)           |
|--------------------------------|-------------|--------------------------------------------|------------------------------|---------------------------|
| <i>Hippocampus guttulatus</i>  | NT          | AS, Cor, DCBWH, RBWAC, MB, PB, SBWAC, SBWH | marine, brackish             | 0 - 20                    |
| <i>Hippocampus hippocampus</i> | NT          | AS, Cor, DCBWH, PB, RBWAC, SBWH            | marine                       | 0 - 60                    |
| <i>Nerophis maculatus</i>      | DD          | PB, RBWAC, SBWAC                           | Marine                       | 0 - 30                    |
| <i>Nerophis ophidion</i>       | DD          | PB, RBWAC, SBWAC                           | marine, brackish, freshwater | 2 - 15                    |
| <i>Syngnathus abaster</i>      | DD          | MB, PB, SBWAC                              | marine, brackish, freshwater | 0 - 5                     |
| <i>Syngnathus abaster</i>      | DD          | DCBWH, MB, PB, SBWAC, SBWH                 | marine, brackish             | 0 - 110, usually up to 15 |
| <i>Syngnathus phlegon</i>      | DD          | Pelagic; typically, offshore               | marine                       | up to 200                 |
| <i>Syngnathus taenionotus</i>  | DD          | MB, PB, SBWAC                              | marine, brackish             | 0-5                       |
| <i>Syngnathus tenuirostris</i> | DD          | Cor, DCBWH, RBWAC                          | marine                       | 0 - 25                    |
| <i>Syngnathus typhle</i>       | DD          | PB, RBWAC, SBWAC                           | marine, brackish             | 0 - 20                    |
